# Supplementary material
Source: bioRxiv or medRxiv preprint supplement (https://www.biorxiv.org/content/biorxiv/early/2020/05/19/2020.05.17.100909/DC1/embed/media-1.pdf)
Supplement: Supplementary file [file media-1.pdf]

Supplementary Table 1. Reporting statistical results

| Behavior Task / Comparable                               | Figure | n                                   | Mean                                                                                                                              |       |       |       |       |       |       |        |        |        |        |        |        |        |        |        | Statistics (variables)  | Main Effect or Interaction                   | F Value                                       | P value                                      | Post-hoc Testing Between Treatment Groups |                                                               |     |
|----------------------------------------------------------|--------|-------------------------------------|-----------------------------------------------------------------------------------------------------------------------------------|-------|-------|-------|-------|-------|-------|--------|--------|--------|--------|--------|--------|--------|--------|--------|-------------------------|----------------------------------------------|-----------------------------------------------|----------------------------------------------|-------------------------------------------|---------------------------------------------------------------|-----|
|                                                          |        |                                     | Wk 0                                                                                                                              | Wk 1  | Wk 2  | Wk 3  | Wk 4  | Wk 5  | Wk 6  | Wk 7   | Wk 8   | Wk 9   | Wk 10  | Wk 11  | Wk 12  | Wk 13  | Wk 14  | Wk 15  |                         |                                              |                                               |                                              |                                           | Wk 16                                                         |     |
| Body Weight (g)                                          | 1B     | Vehicle: 8<br>CNO: 8<br>C21: 8 / 7* | 31.95                                                                                                                             | 31.89 | 31.95 | 32.11 | 31.98 | 32.63 | 33.5  | 33     | 32.74  | 33.64  | 34.6   | 35.33  | 36.14  | 36.08  | 36.84  | 37.48  | 37.51                   | Mixed<br>Mesaure<br>Analysis                 | Week x<br>Treatment<br><br>Weeks<br>Treatment | F (32, 326) = 0.6287                         | 0.9438                                    | N/A                                                           |     |
|                                                          |        |                                     | 29.43                                                                                                                             | 29.68 | 29.88 | 28.18 | 29.79 | 30.44 | 30.93 | 30.26  | 30.53  | 31.13  | 31.88  | 32.63  | 33.31  | 33.68  | 34.08  | 33.7   | 33.9                    |                                              |                                               |                                              |                                           |                                                               |     |
|                                                          |        |                                     | 30.39                                                                                                                             | 30.43 | 30.61 | 31.18 | 31.34 | 31.79 | 32.48 | 31.27* | 31.92* | 33.01* | 34.19* | 34.19* | 34.39* | 34.97* | 35.22* | 35.38* | 35.81*                  |                                              |                                               |                                              |                                           |                                                               |     |
|                                                          |        |                                     | # of Beam Breaks                                                                                                                  |       |       |       |       |       |       |        |        |        |        |        |        |        |        |        |                         |                                              |                                               |                                              |                                           |                                                               |     |
| Locomotion<br>Total Beam Break<br>Post-Injection         | 2A     | Vehicle: 8<br>CNO: 8<br>C21: 8      | 359.9                                                                                                                             |       |       |       |       |       |       |        |        |        |        |        |        |        |        |        |                         | One-Way<br>ANOVA                             | Treatment                                     | F (2, 21) = 2.900                            | 0.0772                                    | N/A                                                           |     |
|                                                          |        |                                     | 459.5                                                                                                                             |       |       |       |       |       |       |        |        |        |        |        |        |        |        |        |                         |                                              |                                               |                                              |                                           |                                                               |     |
|                                                          |        |                                     | 443.8                                                                                                                             |       |       |       |       |       |       |        |        |        |        |        |        |        |        |        |                         |                                              |                                               |                                              |                                           |                                                               |     |
|                                                          |        |                                     | # @ 5-min    # @ 10-min    # @ 15-min    # @ 20-min    # @ 25--min    # @ 30-min                                                  |       |       |       |       |       |       |        |        |        |        |        |        |        |        |        |                         |                                              |                                               |                                              |                                           |                                                               |     |
| Locomotion<br>Beam Breaks<br>over Time<br>Post-Injection | 2B     | Vehicle: 8<br>CNO: 8<br>C21: 8      | 78.63                                                                                                                             | 68.38 |       |       | 58.5  |       |       | 54     |        |        | 55.38  |        |        | 28.5   |        |        | RM Two-<br>Way<br>ANOVA | Time x Treat<br>Time<br>Treatment<br>Subject | F (10, 105) = 1.793                           | 0.0706                                       | N/A                                       |                                                               |     |
|                                                          |        |                                     | 115.4                                                                                                                             | 81.88 |       |       | 68.25 |       |       | 59.38  |        |        | 59.88  |        |        | 57.75  |        |        |                         |                                              |                                               |                                              |                                           |                                                               |     |
|                                                          |        |                                     | 107.6                                                                                                                             | 75.75 |       |       | 70.75 |       |       | 65.25  |        |        | 60.5   |        |        | 49.63  |        |        |                         |                                              |                                               |                                              |                                           |                                                               |     |
|                                                          |        |                                     | # of Beam Breaks                                                                                                                  |       |       |       |       |       |       |        |        |        |        |        |        |        |        |        |                         |                                              |                                               |                                              |                                           |                                                               |     |
| Locomotion<br>Total Beam Break<br>No Injection           | 2C     | Vehicle: 8<br>CNO: 8<br>C21: 8      | 205.5                                                                                                                             |       |       |       |       |       |       |        |        |        |        |        |        |        |        |        |                         | One-Way<br>ANOVA                             | Treatment                                     | F (2, 21) = 0.7004                           | 0.5076                                    | N/A                                                           |     |
|                                                          |        |                                     | 233.6                                                                                                                             |       |       |       |       |       |       |        |        |        |        |        |        |        |        |        |                         |                                              |                                               |                                              |                                           |                                                               |     |
|                                                          |        |                                     | 255.6                                                                                                                             |       |       |       |       |       |       |        |        |        |        |        |        |        |        |        |                         |                                              |                                               |                                              |                                           |                                                               |     |
|                                                          |        |                                     | # @ 5-min    # @ 10-min    # @ 15-min    # @ 20-min    # @ 25--min    # @ 30-min                                                  |       |       |       |       |       |       |        |        |        |        |        |        |        |        |        |                         |                                              |                                               |                                              |                                           |                                                               |     |
| Locomotion<br>Beam Breaks<br>over Time<br>No Injection   | 2D     | Vehicle: 8<br>CNO: 8<br>C21: 8      | 53                                                                                                                                | 37.63 |       |       | 32.88 |       |       | 29.13  |        |        | 33.75  |        |        | 19.13  |        |        | RM Two-<br>Way<br>ANOVA | Time x Treat<br>Time<br>Treatment<br>Subject | F (10, 105) = 1.380                           | 0.1995                                       | N/A                                       |                                                               |     |
|                                                          |        |                                     | 52                                                                                                                                | 39.63 |       |       | 35.38 |       |       | 40.5   |        |        | 30.5   |        |        | 35.63  |        |        |                         |                                              |                                               |                                              |                                           |                                                               |     |
|                                                          |        |                                     | 63.63                                                                                                                             | 55.13 |       |       | 44.5  |       |       | 36.13  |        |        | 30     |        |        | 26.25  |        |        |                         |                                              |                                               |                                              |                                           |                                                               |     |
|                                                          |        |                                     | Centimeters                                                                                                                       |       |       |       |       |       |       |        |        |        |        |        |        |        |        |        |                         |                                              |                                               |                                              |                                           |                                                               |     |
| Open Field Test<br>Distance                              | 3A     | Vehicle: 8<br>CNO: 8<br>C21: 8      | 1833                                                                                                                              |       |       |       |       |       |       |        |        |        |        |        |        |        |        |        |                         | One-Way<br>ANOVA                             | Treatment                                     | F (2, 21) = 0.5440                           | 0.5884                                    | N/A                                                           |     |
|                                                          |        |                                     | 2128                                                                                                                              |       |       |       |       |       |       |        |        |        |        |        |        |        |        |        |                         |                                              |                                               |                                              |                                           |                                                               |     |
|                                                          |        |                                     | 1993                                                                                                                              |       |       |       |       |       |       |        |        |        |        |        |        |        |        |        |                         |                                              |                                               |                                              |                                           |                                                               |     |
|                                                          |        |                                     | # of Entries                                                                                                                      |       |       |       |       |       |       |        |        |        |        |        |        |        |        |        |                         |                                              |                                               |                                              |                                           |                                                               |     |
| Open Field Test<br>Entries to<br>Center Zone             | 3B     | Vehicle: 8<br>CNO: 8<br>C21: 8      | 8.875                                                                                                                             |       |       |       |       |       |       |        |        |        |        |        |        |        |        |        |                         | One-Way<br>ANOVA                             | Treatment                                     | F (2, 21) = 3.636                            | 0.0441                                    | Bonferroni<br>All comparisons<br>between<br>treatments p>0.05 |     |
|                                                          |        |                                     | 15.63                                                                                                                             |       |       |       |       |       |       |        |        |        |        |        |        |        |        |        |                         |                                              |                                               |                                              |                                           |                                                               |     |
|                                                          |        |                                     | 9.5                                                                                                                               |       |       |       |       |       |       |        |        |        |        |        |        |        |        |        |                         |                                              |                                               |                                              |                                           |                                                               |     |
|                                                          |        |                                     | Seconds                                                                                                                           |       |       |       |       |       |       |        |        |        |        |        |        |        |        |        |                         |                                              |                                               |                                              |                                           |                                                               |     |
| Open Field Test<br>Duration in<br>Center Zone            | 3C     | Vehicle: 8<br>CNO: 8<br>C21: 8      | 7.915                                                                                                                             |       |       |       |       |       |       |        |        |        |        |        |        |        |        |        |                         | One-Way<br>ANOVA                             | Treatment                                     | F (2, 21) = 3.308                            | 0.0564                                    | N/A                                                           |     |
|                                                          |        |                                     | 20.29                                                                                                                             |       |       |       |       |       |       |        |        |        |        |        |        |        |        |        |                         |                                              |                                               |                                              |                                           |                                                               |     |
|                                                          |        |                                     | 11.98                                                                                                                             |       |       |       |       |       |       |        |        |        |        |        |        |        |        |        |                         |                                              |                                               |                                              |                                           |                                                               |     |
|                                                          |        |                                     | Centimeters                                                                                                                       |       |       |       |       |       |       |        |        |        |        |        |        |        |        |        |                         |                                              |                                               |                                              |                                           |                                                               |     |
| Elevated Plus<br>Maze<br>Distance                        | 3D     | Vehicle: 8<br>CNO: 8<br>C21: 8      | 1111                                                                                                                              |       |       |       |       |       |       |        |        |        |        |        |        |        |        |        |                         | One-Way<br>ANOVA                             | Treatment                                     | F (2, 21) = 0.3409                           | 0.715                                     | N/A                                                           |     |
|                                                          |        |                                     | 1189                                                                                                                              |       |       |       |       |       |       |        |        |        |        |        |        |        |        |        |                         |                                              |                                               |                                              |                                           |                                                               |     |
|                                                          |        |                                     | 1212                                                                                                                              |       |       |       |       |       |       |        |        |        |        |        |        |        |        |        |                         |                                              |                                               |                                              |                                           |                                                               |     |
|                                                          |        |                                     | # of Entries                                                                                                                      |       |       |       |       |       |       |        |        |        |        |        |        |        |        |        |                         |                                              |                                               |                                              |                                           |                                                               |     |
| Elevated Plus<br>Maze<br>Entries to<br>Open Arms         | 3E     | Vehicle: 8<br>CNO: 8<br>C21: 8      | 7.375                                                                                                                             |       |       |       |       |       |       |        |        |        |        |        |        |        |        |        |                         | One-Way<br>ANOVA                             | Treatment                                     | F (2, 21) = 0.9192                           | 0.4143                                    | N/A                                                           |     |
|                                                          |        |                                     | 11.25                                                                                                                             |       |       |       |       |       |       |        |        |        |        |        |        |        |        |        |                         |                                              |                                               |                                              |                                           |                                                               |     |
|                                                          |        |                                     | 11.13                                                                                                                             |       |       |       |       |       |       |        |        |        |        |        |        |        |        |        |                         |                                              |                                               |                                              |                                           |                                                               |     |
|                                                          |        |                                     | Seconds                                                                                                                           |       |       |       |       |       |       |        |        |        |        |        |        |        |        |        |                         |                                              |                                               |                                              |                                           |                                                               |     |
| Elevated Plus<br>Maze<br>Duration in<br>Open Arms        | 3F     | Vehicle: 8<br>CNO: 8<br>C21: 8      | 37.1                                                                                                                              |       |       |       |       |       |       |        |        |        |        |        |        |        |        |        |                         | One-Way<br>ANOVA                             | Treatment                                     | F (2, 21) = 1.235                            | 0.3112                                    | N/A                                                           |     |
|                                                          |        |                                     | 45.44                                                                                                                             |       |       |       |       |       |       |        |        |        |        |        |        |        |        |        |                         |                                              |                                               |                                              |                                           |                                                               |     |
|                                                          |        |                                     | 52.37                                                                                                                             |       |       |       |       |       |       |        |        |        |        |        |        |        |        |        |                         |                                              |                                               |                                              |                                           |                                                               |     |
|                                                          |        |                                     | cm @ 30-min    cm @ 60-min    cm @ 90-min    cm @ 120-min    cm @ 150-min    cm @ 180-min    cm @ 210-min    cm @ 240-min         |       |       |       |       |       |       |        |        |        |        |        |        |        |        |        |                         |                                              |                                               |                                              |                                           |                                                               |     |
| Activity Monitoring<br>Ambulatory<br>Distance            | 4A     | Vehicle: 8<br>CNO: 8<br>C21: 7      | 2900                                                                                                                              | 1578  | 1234  | 191.6 | 610   | 262.8 | 175.8 | 81.29  |        |        |        |        |        |        |        |        |                         |                                              | Mixed<br>Mesaure<br>Analysis                  | Time x Treat<br>Time<br>Treatment<br>Subject | F (14, 140) = 0.5073                      | 0.5073                                                        | N/A |
|                                                          |        |                                     | 3160                                                                                                                              | 2022  | 1381  | 1131  | 455   | 722.5 | 774.8 | 422    |        |        |        |        |        |        |        |        |                         |                                              |                                               |                                              |                                           |                                                               |     |
|                                                          |        |                                     | 3129                                                                                                                              | 1702  | 778.9 | 256.6 | 254   | 120.7 | 148.6 | 153.7  |        |        |        |        |        |        |        |        |                         |                                              |                                               |                                              |                                           |                                                               |     |
|                                                          |        |                                     | Sec @ 30-min    Sec @ 60-min    Sec @ 90-min    Sec @ 120-min    Sec @ 150-min    Sec @ 180-min    Sec @ 210-min    Sec @ 240-min |       |       |       |       |       |       |        |        |        |        |        |        |        |        |        |                         |                                              |                                               |                                              |                                           |                                                               |     |
| Activity Monitoring<br>Ambulatory<br>Duration            | 4B     | Vehicle: 8<br>CNO: 8<br>C21: 7      | 144.9                                                                                                                             | 88.02 | 62.54 | 49.96 | 18.95 | 30.17 | 31.98 | 17.44  |        |        |        |        |        |        |        |        |                         |                                              | Mixed<br>Mesaure<br>Analysis                  | Time x Treat<br>Time<br>Treatment<br>Subject | F (14, 140) = 1.013                       | 0.444                                                         | N/A |
|                                                          |        |                                     | 137.1                                                                                                                             | 76.93 | 58.09 | 9.913 | 30.36 | 12.34 | 7.65  | 3.769  |        |        |        |        |        |        |        |        |                         |                                              |                                               |                                              |                                           |                                                               |     |
|                                                          |        |                                     | 147.6                                                                                                                             | 81.43 | 36.11 | 11.81 | 11.99 | 5.864 | 7.914 | 7.814  |        |        |        |        |        |        |        |        |                         |                                              |                                               |                                              |                                           |                                                               |     |
|                                                          |        |                                     | # @ 30-min    # @ 60-min    # @ 90-min    # @ 120-min    # @ 150-min    # @ 180-min    # @ 210-min    # @ 240-min                 |       |       |       |       |       |       |        |        |        |        |        |        |        |        |        |                         |                                              |                                               |                                              |                                           |                                                               |     |
| Activity Monitoring<br>Movement<br>Events                | 4C     | Vehicle: 8<br>CNO: 8<br>C21: 7      | 2319                                                                                                                              | 1410  | 960.9 | 753.5 | 285   | 449.8 | 536.6 | 294.8  |        |        |        |        |        |        |        |        |                         |                                              | Mixed<br>Mesaure<br>Analysis                  | Time x Treat<br>Time<br>Treatment<br>Subject | F (14, 140) = 0.8441                      | 0.6205                                                        | N/A |
|                                                          |        |                                     | 2193                                                                                                                              | 1153  | 887.9 | 129.8 | 468.1 | 179   | 127.9 | 54.37  |        |        |        |        |        |        |        |        |                         |                                              |                                               |                                              |                                           |                                                               |     |
|                                                          |        |                                     | 2381                                                                                                                              | 1245  | 550.3 | 171   | 171.1 | 76.43 | 100.9 | 101.7  |        |        |        |        |        |        |        |        |                         |                                              |                                               |                                              |                                           |                                                               |     |
|                                                          |        |                                     | Number of Jumps                                                                                                                   |       |       |       |       |       |       |        |        |        |        |        |        |        |        |        |                         |                                              |                                               |                                              |                                           |                                                               |     |
| Activity Monitoring<br>Jumps                             | 4D     | Vehicle: 8<br>CNO: 8<br>C21: 7      | 115                                                                                                                               |       |       |       |       |       |       |        |        |        |        |        |        |        |        |        |                         | One-Way<br>ANOVA                             | Treatment                                     | F (2, 20) = 0.5659                           | 0.5767                                    | N/A                                                           |     |
|                                                          |        |                                     | 72.38                                                                                                                             |       |       |       |       |       |       |        |        |        |        |        |        |        |        |        |                         |                                              |                                               |                                              |                                           |                                                               |     |
|                                                          |        |                                     | 121.3                                                                                                                             |       |       |       |       |       |       |        |        |        |        |        |        |        |        |        |                         |                                              |                                               |                                              |                                           |                                                               |     |
|                                                          |        |                                     | % Marbles Buried                                                                                                                  |       |       |       |       |       |       |        |        |        |        |        |        |        |        |        |                         |                                              |                                               |                                              |                                           |                                                               |     |
| Marble Burying<br>% Marbles Buried                       | 5A     | Vehicle: 8<br>CNO: 8<br>C21: 7      | 22.5                                                                                                                              |       |       |       |       |       |       |        |        |        |        |        |        |        |        |        |                         | One-Way<br>ANOVA                             | Treatment                                     | F (2, 20) = 0.09887                          | 0.9063                                    | N/A                                                           |     |
|                                                          |        |                                     | 18.75                                                                                                                             |       |       |       |       |       |       |        |        |        |        |        |        |        |        |        |                         |                                              |                                               |                                              |                                           |                                                               |     |
|                                                          |        |                                     | 22.86                                                                                                                             |       |       |       |       |       |       |        |        |        |        |        |        |        |        |        |                         |                                              |                                               |                                              |                                           |                                                               |     |
|                                                          |        |                                     | % of Total Time                                                                                                                   |       |       |       |       |       |       |        |        |        |        |        |        |        |        |        |                         |                                              |                                               |                                              |                                           |                                                               |     |
| Sucrose Splash<br>Grooming Time                          | 5B     | Vehicle: 5<br>CNO: 8<br>C21: 7      | 42.72                                                                                                                             |       |       |       |       |       |       |        |        |        |        |        |        |        |        |        |                         | One-Way<br>ANOVA                             | Treatment                                     | F (2, 17) = 1.878                            | 0.1833                                    | N/A                                                           |     |
|                                                          |        |                                     | 65.71                                                                                                                             |       |       |       |       |       |       |        |        |        |        |        |        |        |        |        |                         |                                              |                                               |                                              |                                           |                                                               |     |
|                                                          |        |                                     | 67.03                                                                                                                             |       |       |       |       |       |       |        |        |        |        |        |        |        |        |        |                         |                                              |                                               |                                              |                                           |                                                               |     |
|                                                          |        |                                     | Seconds                                                                                                                           |       |       |       |       |       |       |        |        |        |        |        |        |        |        |        |                         |                                              |                                               |                                              |                                           |                                                               |     |
| Sucrose Splash<br>Latency to<br>Groom                    | 5C     | Vehicle: 5<br>CNO: 8<br>C21: 7      | 9.426                                                                                                                             |       |       |       |       |       |       |        |        |        |        |        |        |        |        |        |                         | One-Way<br>ANOVA                             | Treatment                                     | F (2, 17) = 0.7017                           | 0.5096                                    | N/A                                                           |     |
|                                                          |        |                                     | 11.26                                                                                                                             |       |       |       |       |       |       |        |        |        |        |        |        |        |        |        |                         |                                              |                                               |                                              |                                           |                                                               |     |
|                                                          |        |                                     | 5.927                                                                                                                             |       |       |       |       |       |       |        |        |        |        |        |        |        |        |        |                         |                                              |                                               |                                              |                                           |                                                               |     |
|                                                          |        |                                     | # of Events                                                                                                                       |       |       |       |       |       |       |        |        |        |        |        |        |        |        |        |                         |                                              |                                               |                                              |                                           |                                                               |     |
| Sucrose Splash<br>Grooming<br>Events                     | 5D     | Vehicle: 5<br>CNO: 8<br>C21: 7      | 113                                                                                                                               |       |       |       |       |       |       |        |        |        |        |        |        |        |        |        |                         | One-Way<br>ANOVA                             | Treatment                                     | F (2, 17) = 0.4806                           | 0.6266                                    | N/A                                                           |     |
|                                                          |        |                                     | 136.5                                                                                                                             |       |       |       |       |       |       |        |        |        |        |        |        |        |        |        |                         |                                              |                                               |                                              |                                           |                                                               |     |
|                                                          |        |                                     | 158.4                                                                                                                             |       |       |       |       |       |       |        |        |        |        |        |        |        |        |        |                         |                                              |                                               |                                              |                                           |                                                               |     |
